# Supplementary material for: Revealing the mechanism of reductive, mechanochemical Li recycling from LiFePO4
Source: Royal Society of Chemistry journal article supplement (doi:10.1039/d4mr00014e), 2024-01-01
Supplement: d4mr00014e1.pdf [file d4mr00014e1.pdf]

## Supporting information to the manuscript

# Revealing the mechanism of reductive, mechanochemical Li recycling from LiFePO<sub>4</sub>

*David Geiß<sup>1</sup>, Oleksandr Dolotko<sup>1,2,3</sup>, Sylvio Indris<sup>1</sup>, Christian Neemann<sup>1</sup>, Andrei Bologna<sup>1</sup>,  
Thomas Bergfeldt<sup>4</sup>, Michael Knapp<sup>1</sup>, Helmut Ehrenberg<sup>1,2</sup>*

<sup>1</sup> Karlsruhe Institute of Technology (KIT), Institute for Applied Materials-Energy Storage Systems (IAM-ESS), Hermann-von-Helmholtz-Platz 1, D-76344 Eggenstein-Leopoldshafen, Karlsruhe, Germany

<sup>2</sup> Helmholtz-Institute Ulm for Electrochemical Energy Storage (HIU), P.O. Box 3640, D-76021 Karlsruhe, Germany

<sup>4</sup> Karlsruhe Institute of Technology (KIT), Institute for Applied Materials-Applied Materials Physics (IAM-AWP), Hermann-von-Helmholtz-Platz 1, D-76344 Eggenstein-Leopoldshafen, Karlsruhe, Germany

Table S1: Fit parameters used to describe the Fe Mössbauer spectra of LFP ball-milled for up to 5 h with Al metal foil (1:3 molar ratio of LFP to Al): isomer shift (IS), quadrupole splitting (QS), Hyperfine field ( $B_{\text{hf}}$ ), line width ( $\Gamma$ ), and area fraction. IS, QS, and  $\Gamma$  are given in mm/s.  $B_{\text{hf}}$  is given in T.

| sample   |                  | IS           | QS          | $B_{\text{hf}}$ | $\Gamma$    | area frac. |
|----------|------------------|--------------|-------------|-----------------|-------------|------------|
| pristine | Fe <sup>2+</sup> | 1.28 ± 0.01  | 3.13 ± 0.01 | -               | 0.31 ± 0.01 | 94.0 %     |
|          | Fe <sup>3+</sup> | 0.79 ± 0.05  | 0.41 ± 0.26 | -               | 0.40 ± 0.30 | 6.0 %      |
| 0.25 h   | Fe <sup>2+</sup> | 1.28 ± 0.01  | 3.10 ± 0.01 | -               | 0.35 ± 0.01 | 79.2 %     |
|          | Fe <sup>3+</sup> | 0.45 ± 0.02  | 0.78 ± 0.03 | -               | 0.67 ± 0.04 | 20.8 %     |
| 0.5 h    | Fe <sup>2+</sup> | 1.28 ± 0.01  | 3.11 ± 0.01 | -               | 0.34 ± 0.01 | 76.4 %     |
|          | Fe <sup>3+</sup> | 0.43 ± 0.01  | 0.85 ± 0.01 | -               | 0.61 ± 0.02 | 23.6 %     |
| 1 h      | Fe <sup>2+</sup> | 1.47 ± 0.01  | 2.71 ± 0.03 | -               | 0.33 ± 0.04 | 6.7 %      |
|          | Fe <sup>x+</sup> | 0.65 ± 0.01  | 0.44 ± 0.01 | -               | 0.45 ± 0.02 | 27.4 %     |
|          | Fe <sup>y+</sup> | 0.18 ± 0.01  | -           | -               | 0.07 ± 0.01 | 65.9 %     |
| 2 h      | Fe <sup>x+</sup> | 0.45 ± 0.01  | 0.78 ± 0.01 | -               | 0.41 ± 0.02 | 27.3 %     |
|          | Fe <sup>y+</sup> | 0.29 ± 0.01  | 0.30 ± 0.01 | -               | 0.64 ± 0.01 | 72.7 %     |
| 3 h      | Fe <sup>x+</sup> | 0.41 ± 0.01  | 0.64 ± 0.02 | -               | 0.60 ± 0.02 | 65.8 %     |
|          | Fe <sup>y+</sup> | 0.22 ± 0.02  | 0.34 ± 0.03 | -               | 0.48 ± 0.04 | 34.2 %     |
| 5 h      | Fe <sup>x+</sup> | 0.43 ± 0.01  | 0.64 ± 0.01 | -               | 0.51 ± 0.01 | 53.7 %     |
|          | Fe <sup>y+</sup> | 0.20 ± 0.01  | 0.41 ± 0.01 | -               | 0.43 ± 0.01 | 29.7 %     |
|          | Fe <sup>0</sup>  | -0.00 ± 0.02 | 0.06 ± 0.03 | 31.3 ± 0.1      | 1.13 ± 0.05 | 16.6 %     |

<sup>3</sup> NIO GmbH, Montgelasstraße 14, D-81679 Munich, Germany

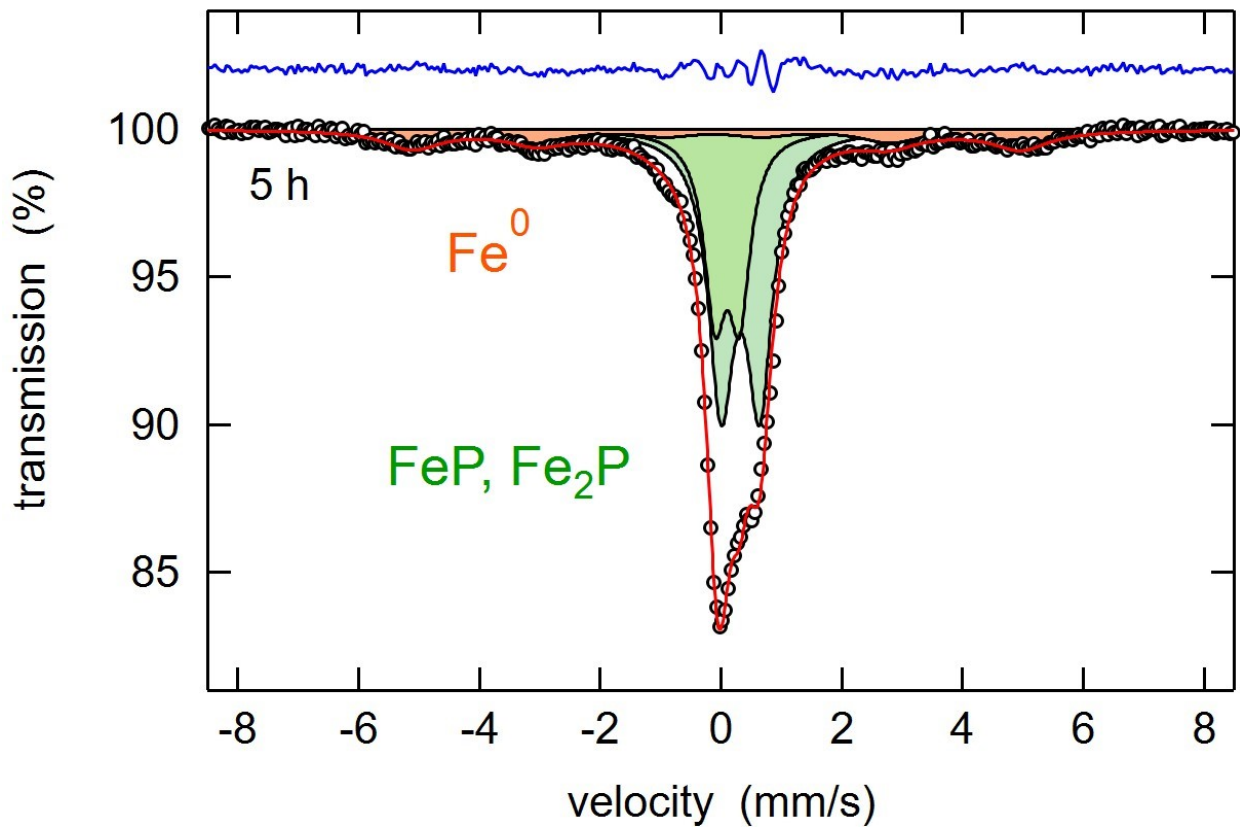

Figure S1: Mössbauer spectrum of LFP ball-milled with Al for 5 h (1:3 molar ratio of LFP to Al).

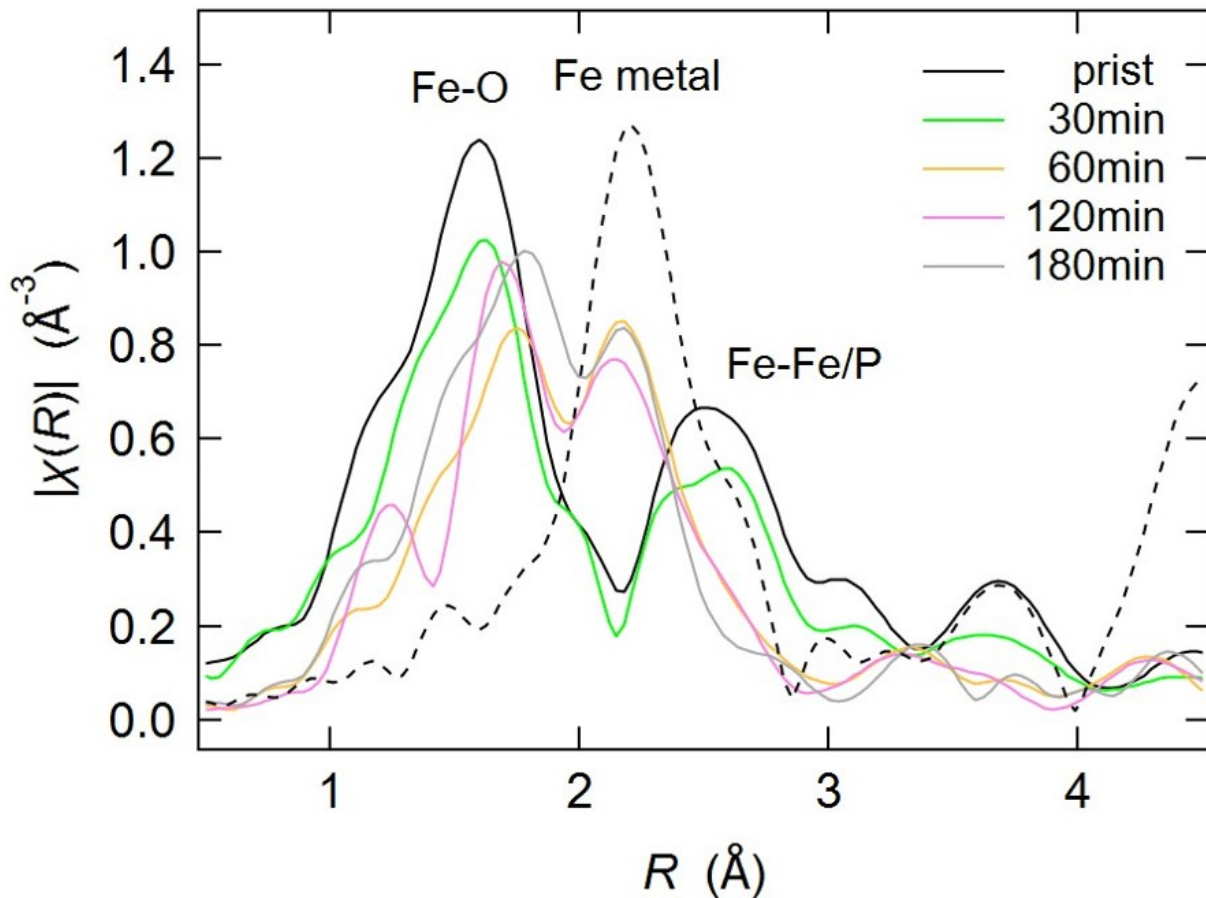

Figure S2: Fourier-transformed Fe K-edge extended X-ray absorption fine structure (EXAFS) spectra of pristine LFP and LFP ball-milled with Al metal foil for 0.5 h to 5 h (1:3 molar ratio of LFP to Al). The radial distribution function of elemental iron was plotted for comparison.

[Hier eingeben]

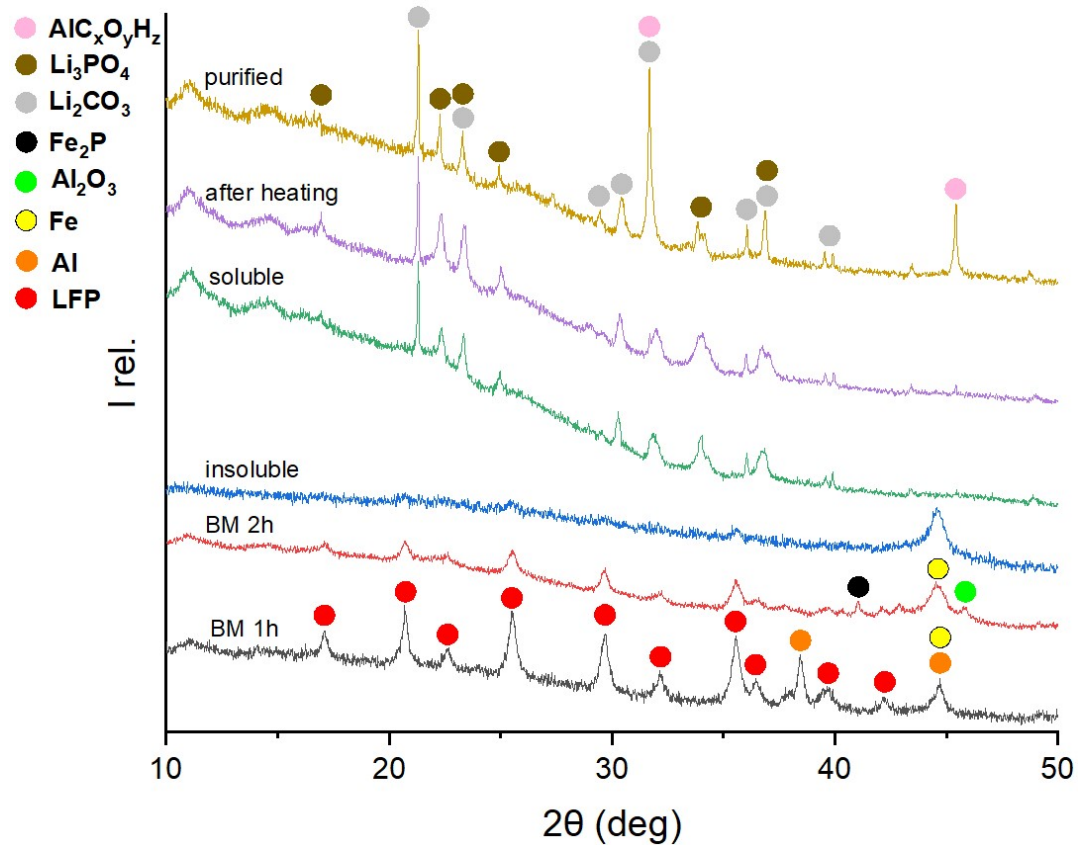

Figure S3: XRD patterns of the products after ball-milling, leaching and purification process obtained from a 1:1 molar mixture of LFP and Al. The most intense Bragg-reflections are assigned to different phases for analysis.

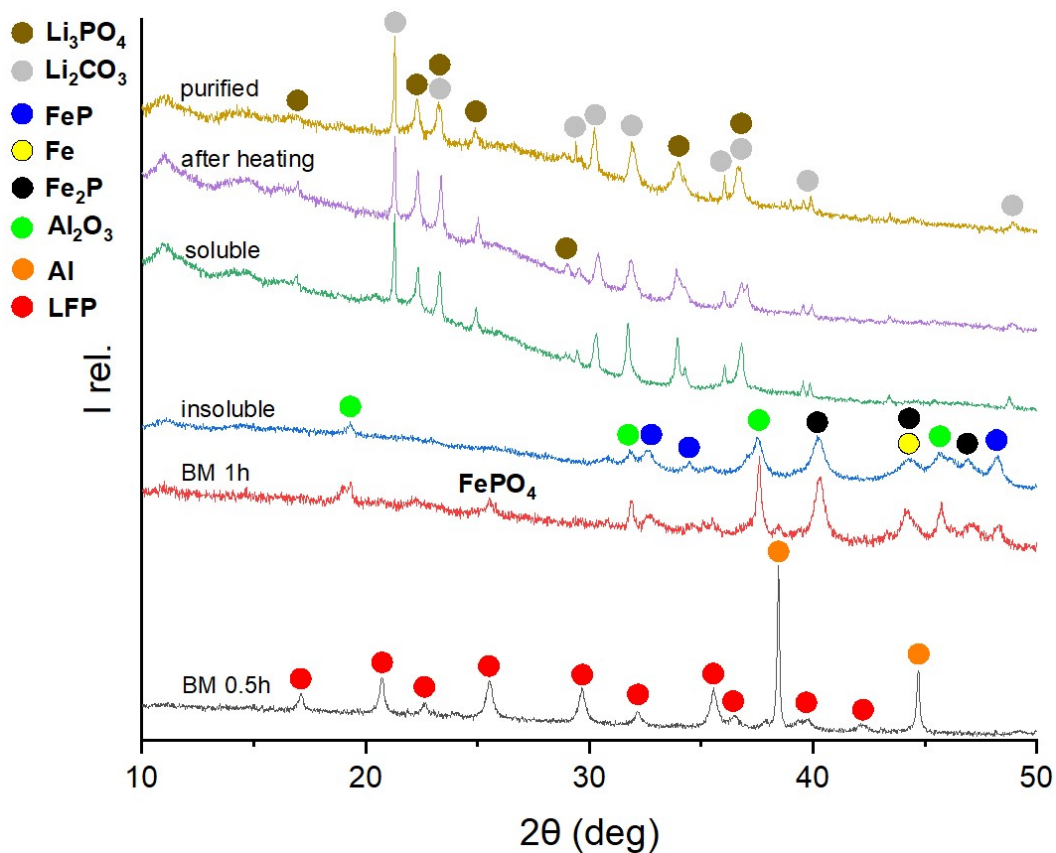

Figure S4: XRD patterns of the products after ball-milling, leaching and purification process obtained from a 1:2 molar mixture of LFP and Al. The most intense Bragg-reflections are assigned to different phases for analysis.

[Hier eingeben]

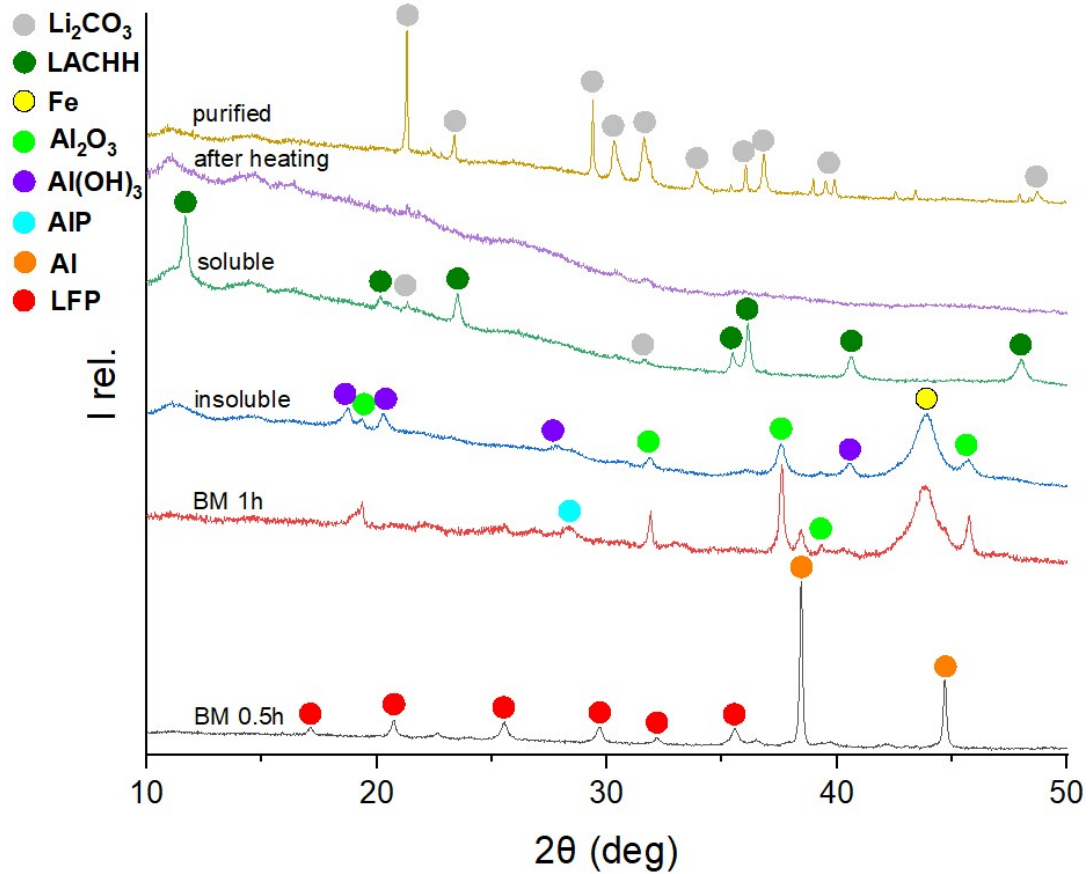

Figure S5: XRD patterns of the products after ball-milling, leaching and purification process obtained from a 1:5 molar mixture of LFP and Al. The most intense Bragg-reflections are assigned to different phases for analysis.

### Calculation of $\text{Li}_2\text{CO}_3$ purity and Lithium lost in the insoluble parts

$\text{Li}_2\text{CO}_3$  purity:

The purity as well as the amount of impurities was determined using the results obtained by ICP-OES measurements. To calculate the  $\text{Li}_2\text{CO}_3$  purity, the weight percentage (wt-%) of Li was used to determine a stoichiometric wt-% of carbon and oxygen.  $\text{Li}_2\text{CO}_3$  purity was then obtained by adding these wt-% to the wt-% of Li. Impurities were stated as received from the measurement except oxygen. For oxygen the oxygen contained in the  $\text{Li}_2\text{CO}_3$  was subtracted.

Lithium lost in the insoluble parts:

To calculate the Li loss the insoluble part was weighted before ICP-OES measurement. The weight was multiplied by the wt-% of Li measured. The resulting mass of Li is transformed to a molar amount and compared to the theoretical Li amount obtained from yield calculation. The calculation is summarized in Eq. S1.

$$\text{Lithium loss [\%]} = \frac{m(\text{insoluble}) \cdot \text{wt\% Li}}{M(\text{Li}) \cdot n(\text{Li yield theo.})} \quad (\text{Eq. S1})$$

[Hier eingeben]
