# Supplementary material for: Revealing the mechanism of reductive, mechanochemical Li recycling from LiFePO4
Source: Royal Society of Chemistry journal article supplement (doi:10.1039/d4mr00014e), 2024-01-01
Supplement: d4mr00014e2.pdf [file d4mr00014e2.pdf]

**Table S1**

| sample   |                  | IS           | QS          | $B_{\text{hf}}$ | $\Gamma$    | area frac. |
|----------|------------------|--------------|-------------|-----------------|-------------|------------|
| pristine | Fe <sup>2+</sup> | 1.28 ± 0.01  | 3.13 ± 0.01 | -               | 0.31 ± 0.01 | 94.0 %     |
|          | Fe <sup>3+</sup> | 0.79 ± 0.05  | 0.41 ± 0.26 | -               | 0.40 ± 0.30 | 6.0 %      |
| 0.25 h   | Fe <sup>2+</sup> | 1.28 ± 0.01  | 3.10 ± 0.01 | -               | 0.35 ± 0.01 | 79.2 %     |
|          | Fe <sup>3+</sup> | 0.45 ± 0.02  | 0.78 ± 0.03 | -               | 0.67 ± 0.04 | 20.8 %     |
| 0.5 h    | Fe <sup>2+</sup> | 1.28 ± 0.01  | 3.11 ± 0.01 | -               | 0.34 ± 0.01 | 76.4 %     |
|          | Fe <sup>3+</sup> | 0.43 ± 0.01  | 0.85 ± 0.01 | -               | 0.61 ± 0.02 | 23.6 %     |
| 1 h      | Fe <sup>2+</sup> | 1.47 ± 0.01  | 2.71 ± 0.03 | -               | 0.33 ± 0.04 | 6.7 %      |
|          | Fe <sup>x+</sup> | 0.65 ± 0.01  | 0.44 ± 0.01 | -               | 0.45 ± 0.02 | 27.4 %     |
|          | Fe <sup>y+</sup> | 0.18 ± 0.01  | -           | -               | 0.07 ± 0.01 | 65.9 %     |
| 2 h      | Fe <sup>x+</sup> | 0.45 ± 0.01  | 0.78 ± 0.01 | -               | 0.41 ± 0.02 | 27.3 %     |
|          | Fe <sup>y+</sup> | 0.29 ± 0.01  | 0.30 ± 0.01 | -               | 0.64 ± 0.01 | 72.7 %     |
| 3 h      | Fe <sup>x+</sup> | 0.41 ± 0.01  | 0.64 ± 0.02 | -               | 0.60 ± 0.02 | 65.8 %     |
|          | Fe <sup>y+</sup> | 0.22 ± 0.02  | 0.34 ± 0.03 | -               | 0.48 ± 0.04 | 34.2 %     |
| 5 h      | Fe <sup>x+</sup> | 0.43 ± 0.01  | 0.64 ± 0.01 | -               | 0.51 ± 0.01 | 53.7 %     |
|          | Fe <sup>y+</sup> | 0.20 ± 0.01  | 0.41 ± 0.01 | -               | 0.43 ± 0.01 | 29.7 %     |
|          | Fe <sup>0</sup>  | -0.00 ± 0.02 | 0.06 ± 0.03 | 31.3 ± 0.1      | 1.13 ± 0.05 | 16.6 %     |

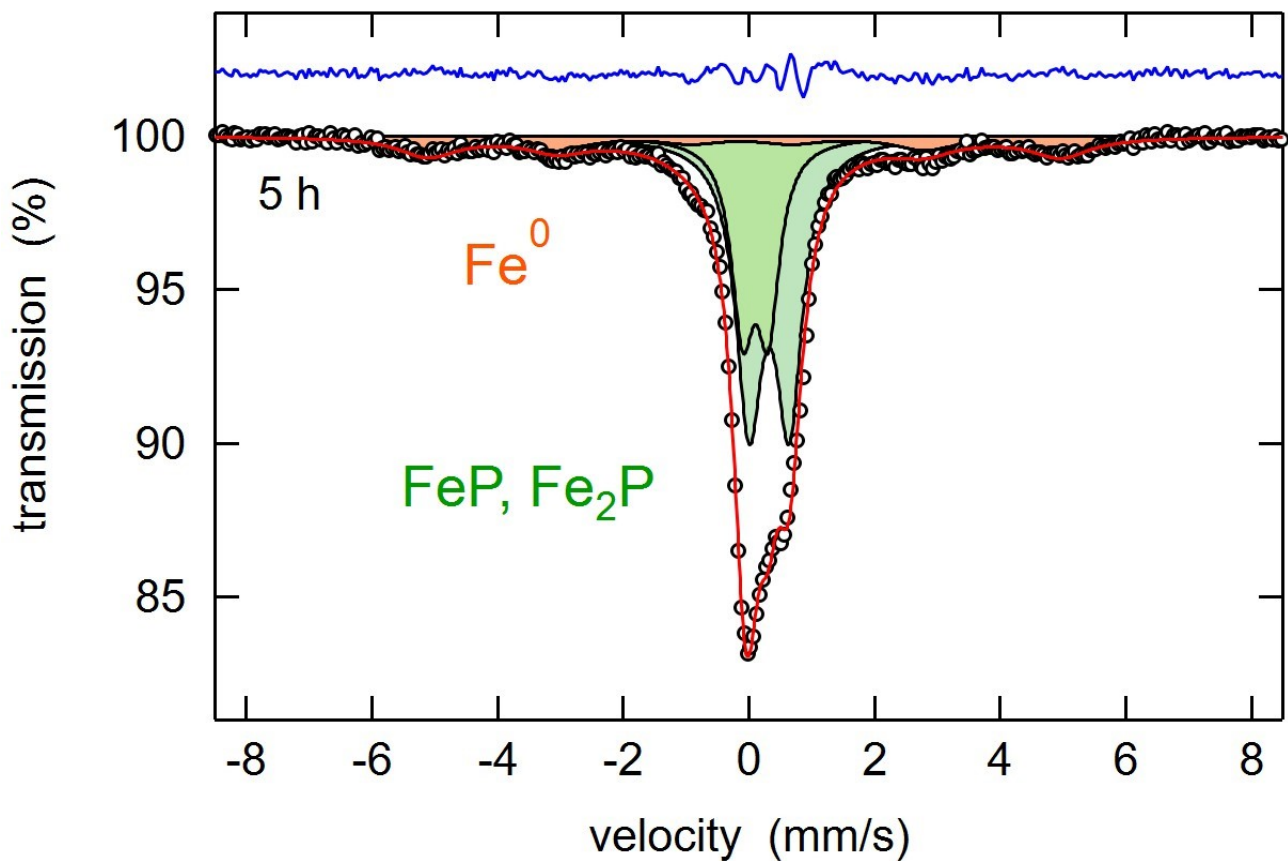

Figure S1

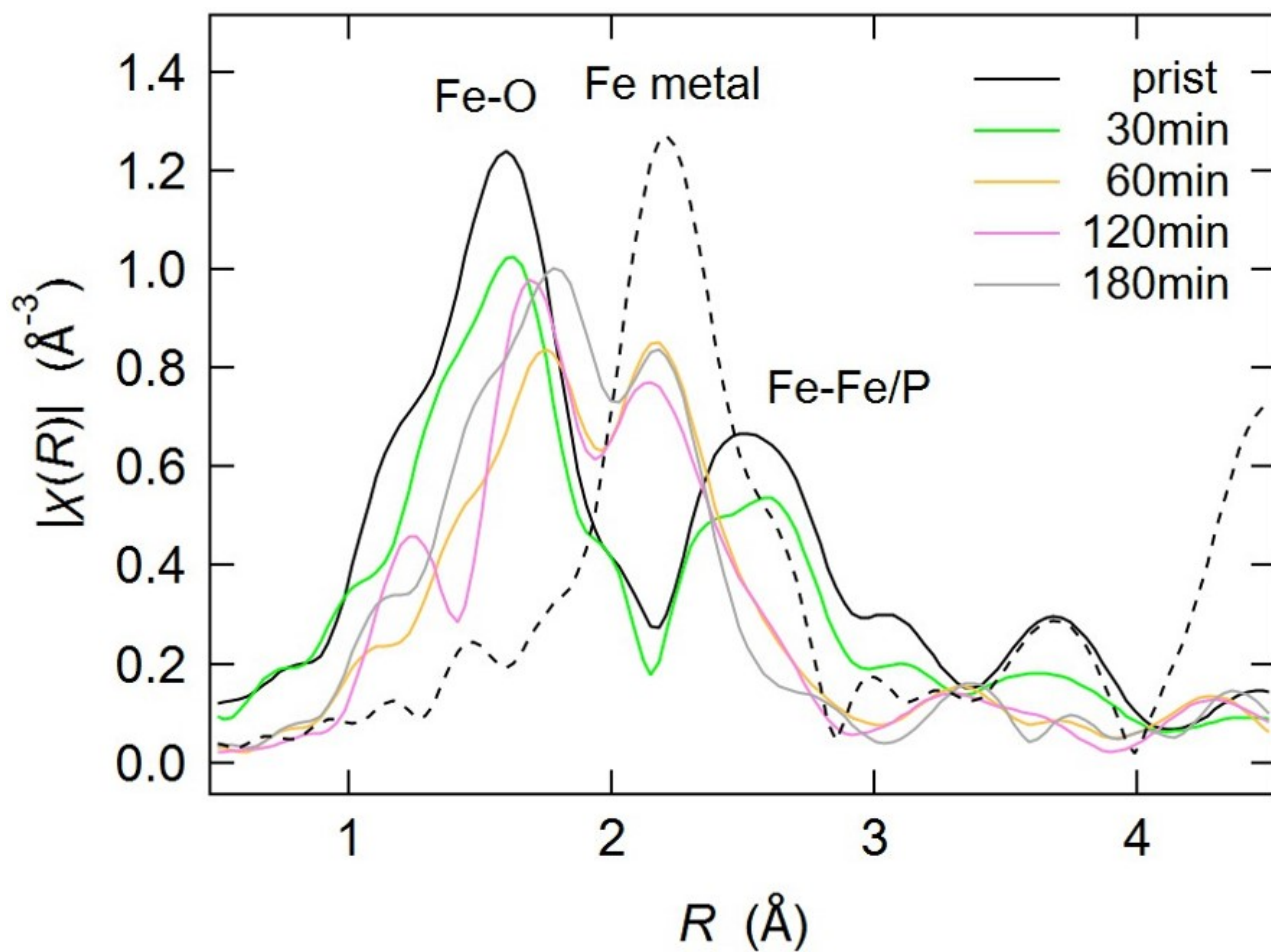

Figure S2

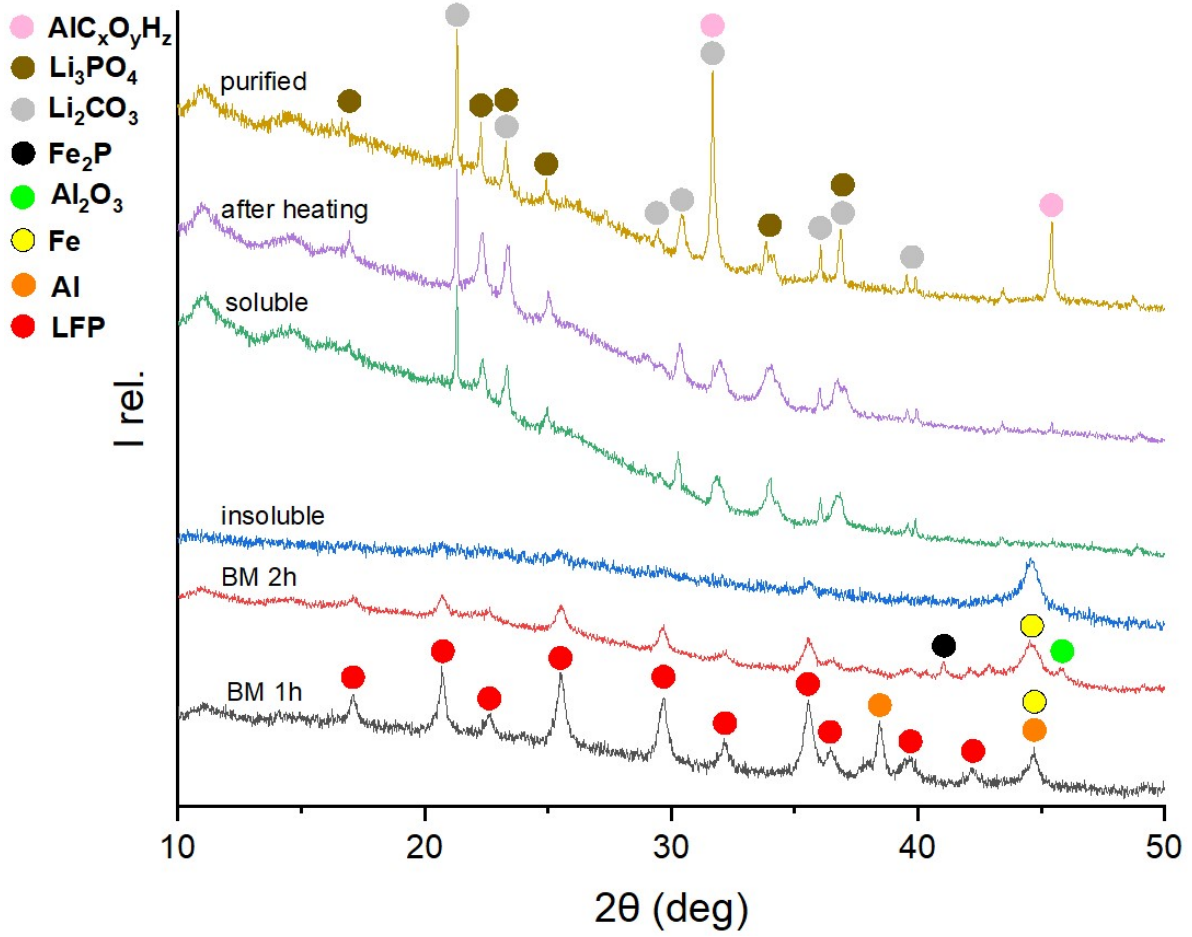

Figure S3

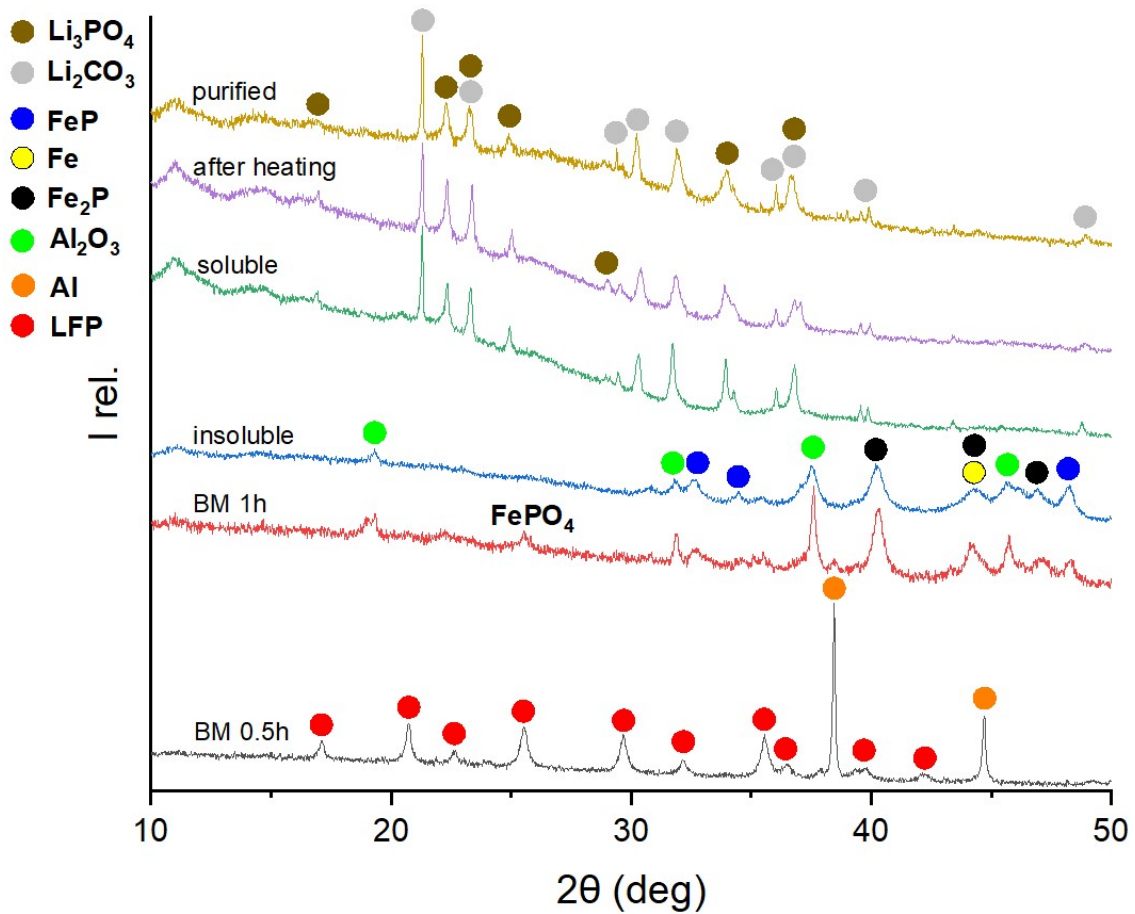

Figure S4

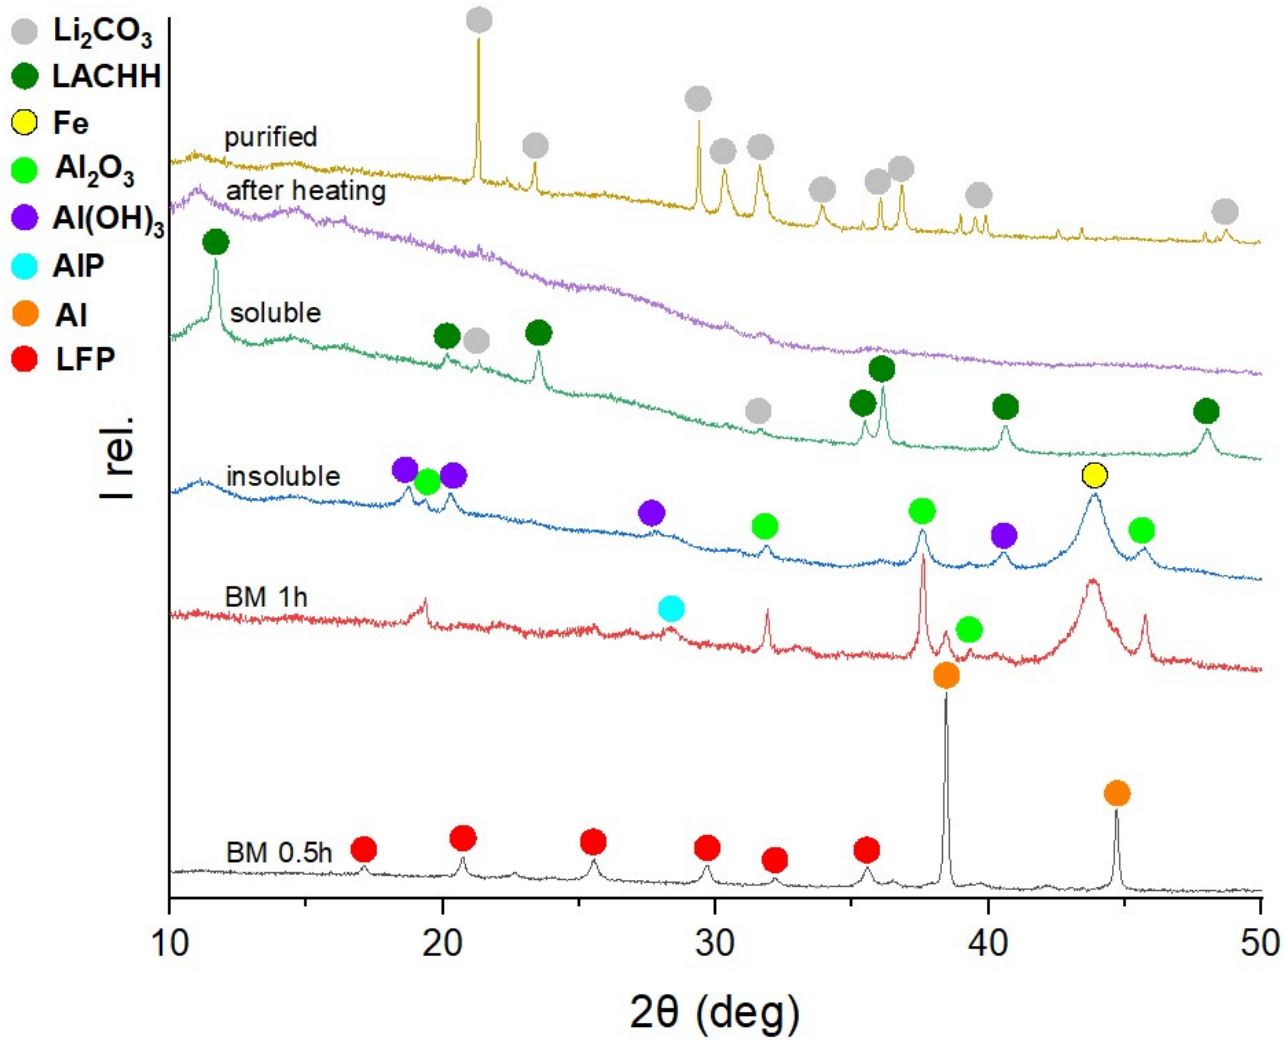

Figure S5
